# Supplementary material for: LGI1 antibody encephalitis: acute treatment comparisons and outcome
Source: HighWire-hosted journal article supplement (doi:10.1136/jnnp-2021-327302), 2021-11-25
Supplement: jnnp-2021-327302supp006_data_supplement.pdf [file jnnp-2021-327302supp006_data_supplement.pdf]

**eFigure. Time from Onset to Treatment Versus Age of Onset**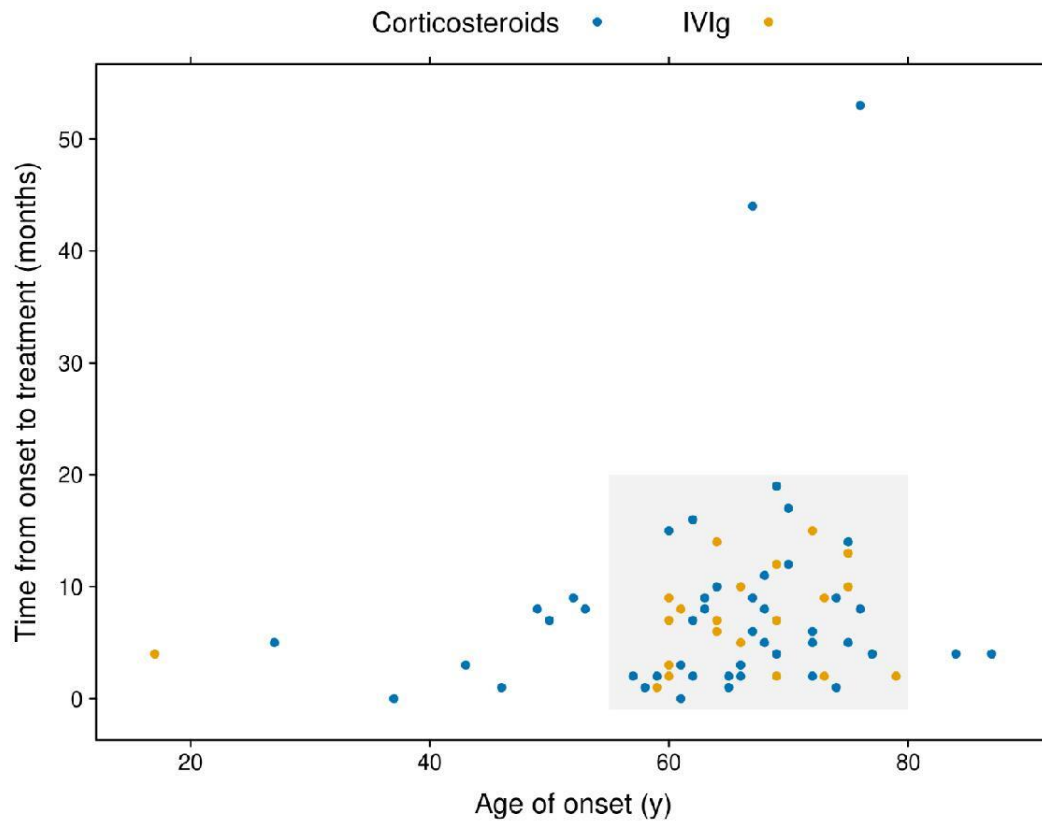

Abbreviation: IVIg, intravenous immunoglobulins.

The two groups did not differ systematically in terms of either age of onset ( $p=0.83$ ) or time from onset to treatment ( $p=0.51$ ). The gray region covers onset ages from 55–80 and treatments undertaken within 20 months and represents a subset of 36 individuals treated with corticosteroids and 20 individuals treated with IVIg who are highly comparable in terms of these baseline factors.
